# Supplementary material for: Site-selective radiolabeling using mushroom tyrosinase and the strain-promoted oxidation-controlled 1,2-quinone cycloaddition
Source: Royal Society of Chemistry journal article supplement (doi:10.1039/d3ra03486k), 2023-01-01
Supplement: d3ra03486k1.pdf [file d3ra03486k1.pdf]

## Supporting Information

### ***Site-Specific Radiolabeling Using Mushroom Tyrosinase and the Strain-Promoted Oxidation-Controlled 1,2-Quinone Cycloaddition***

Cindy Rodriguez<sup>a,b,c</sup>, Samantha Delaney<sup>b,c,d</sup>, Joni Sebastiano<sup>b,c,d</sup>, Samantha M. Sarrett<sup>b,c,d</sup>, Mike A. Cornejo<sup>a,b,c</sup>, Sarah Thau<sup>b</sup>, Meena M. Hosny<sup>b</sup>, and Brian M. Zeglis<sup>a,b,c,d,e</sup>

<sup>a</sup>*Ph.D. Program in Chemistry, Graduate Center of the City University of New York, New York, New York 10016, United States*

<sup>b</sup>*Department of Chemistry, Hunter College, City University of New York, New York, New York, 10065 United States*

<sup>c</sup>*Department of Radiology, Memorial Sloan Kettering Cancer Center, New York, New York 10021 United States*

<sup>d</sup>*Ph.D. Program in Biochemistry, Graduate Center of the City University of New York, New York, New York 10016 United States*

<sup>e</sup>*Department of Radiology, Weill Cornell Medical College, New York, New York 10021 United States*

**Corresponding Author:** Brian M. Zeglis; 413 East 69<sup>th</sup> Street, New York, NY, 10021; Phone: 212-896-0433; E-mail: [bz102@hunter.cuny.edu](mailto:bz102@hunter.cuny.edu)

**Running Title:** Site-Specific Radiolabeling Using Mushroom Tyrosinase and the Strain-Promoted Oxidation-Controlled 1,2-Quinone Cycloaddition

**Keywords:** Site-specific bioconjugation; site-selective bioconjugation; biorthogonal chemistry; click chemistry; immunoPET

## SUPPLEMENTAL FIGURES

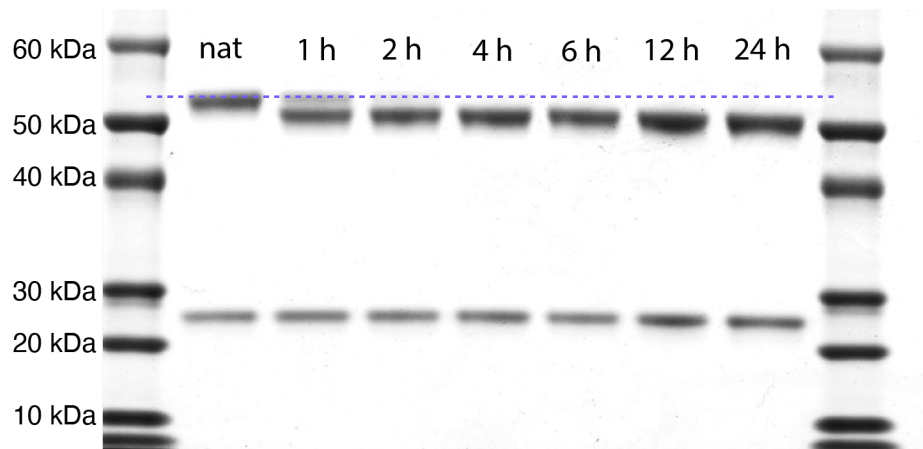

**Figure S1.** Protein-stained SDS-PAGE of huA33 exposed to PNGaseF for various amounts of time. The dotted line denotes the mass of the heavy chain of the parental IgG.

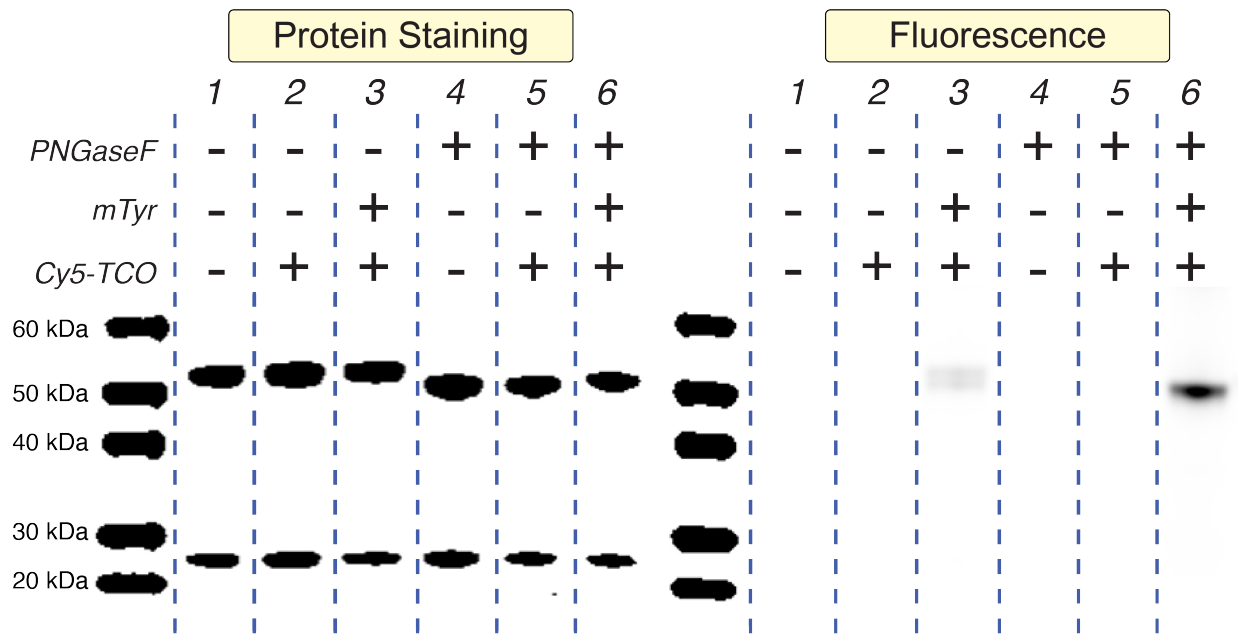

**Figure S2.** Protein-stained and fluorescent SDS-PAGE of pertuzumab modified under various conditions.

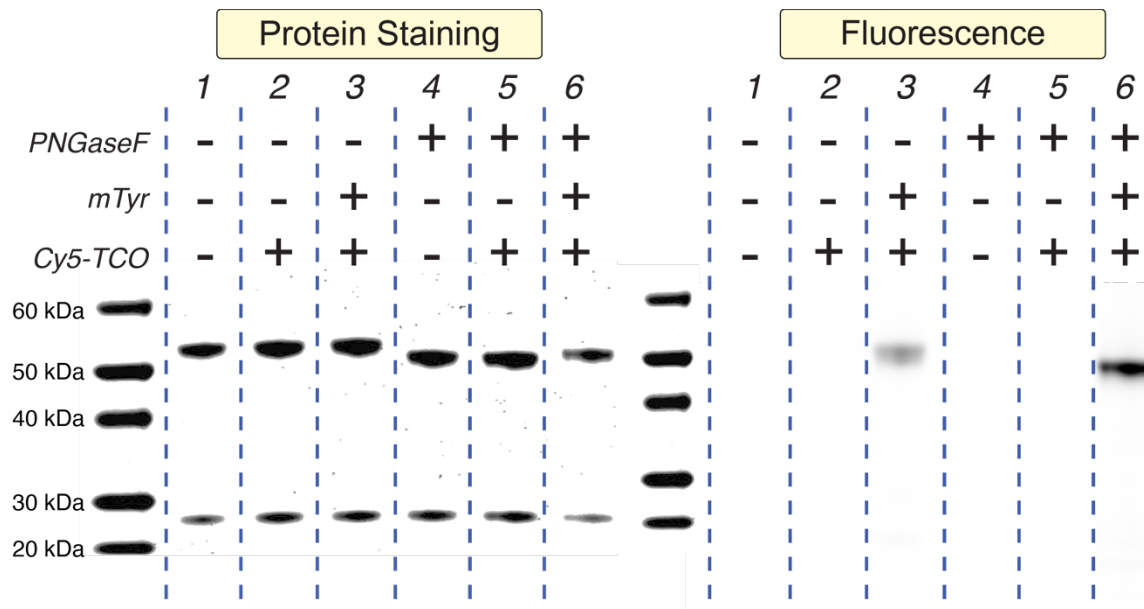

**Figure S3.** Protein-stained and fluorescent SDS-PAGE of trastuzumab modified under various conditions.

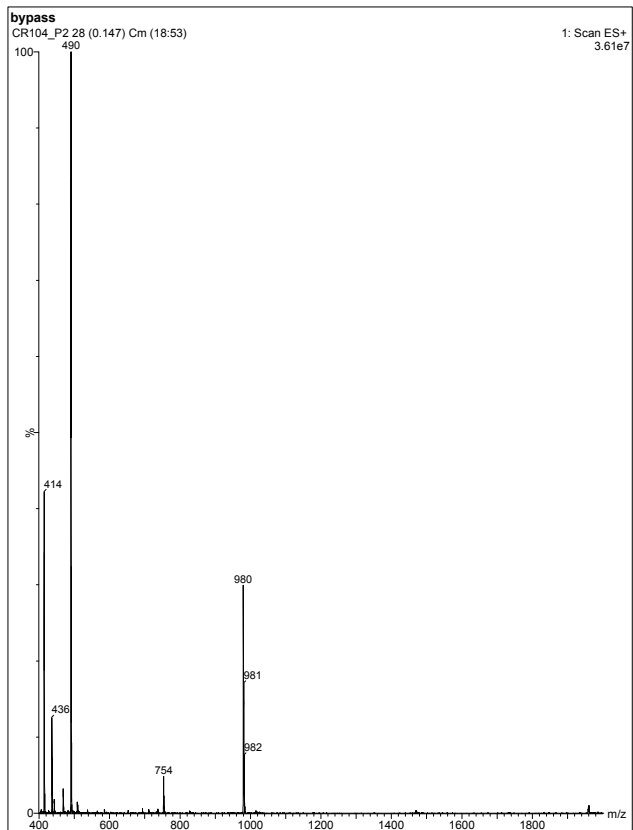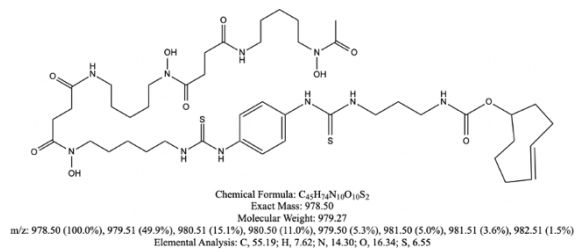

**Figure S4.** ESI-MS of purified DFO-TCO.

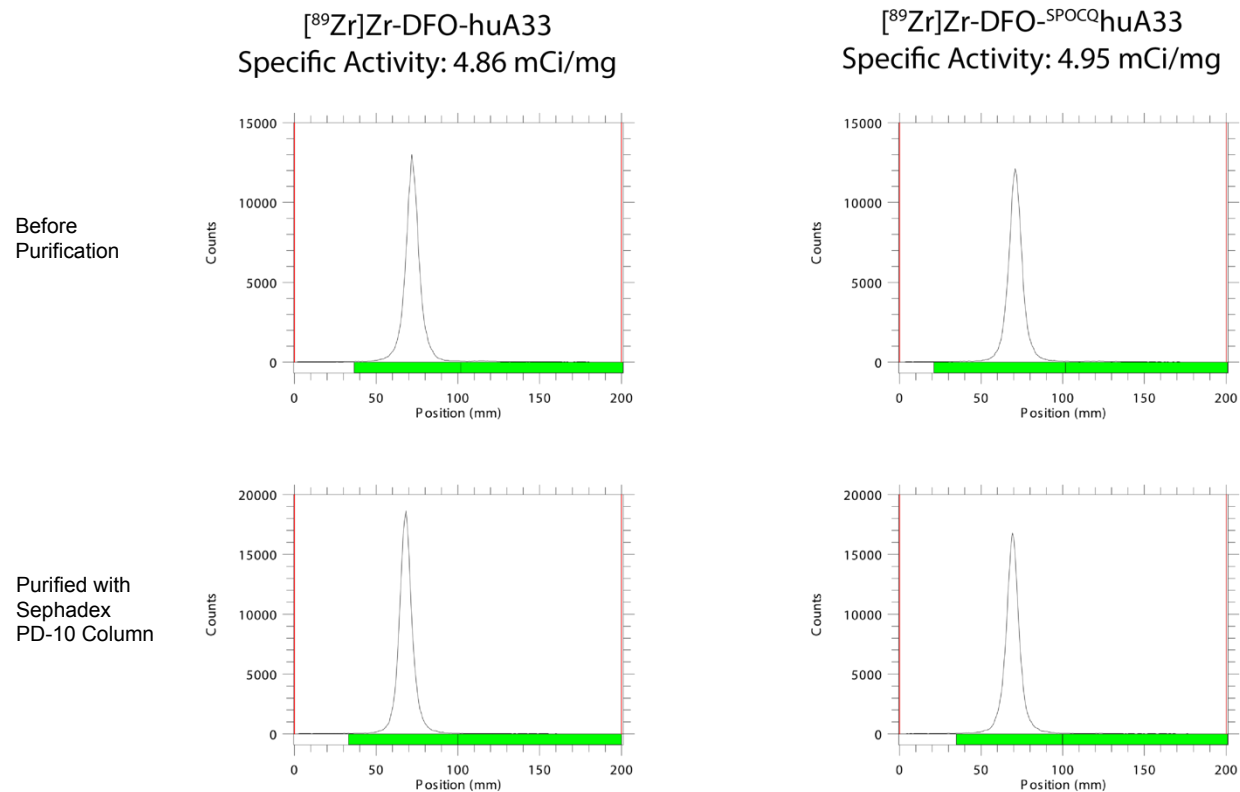

**Figure S5. Representative radio-iTLC chromatograms.** The radiolabeling of [<sup>89</sup>Zr]Zr-DFO-huA33 and [<sup>89</sup>Zr]Zr-DFO-<sup>SPOCQ</sup>huA33 was followed via radio-iTLC using EDTA (50 mM, pH 5.0) as the eluent. Both constructs typically displayed >98% radiochemical purity both before and after purification via gel filtration. The peak at ~75 mm corresponds to the radiolabeled antibody; any free [<sup>89</sup>Zr]Zr-EDTA would be seen at ~150 mm. All radiolabeling studies and iTLC scans were performed in triplicate.

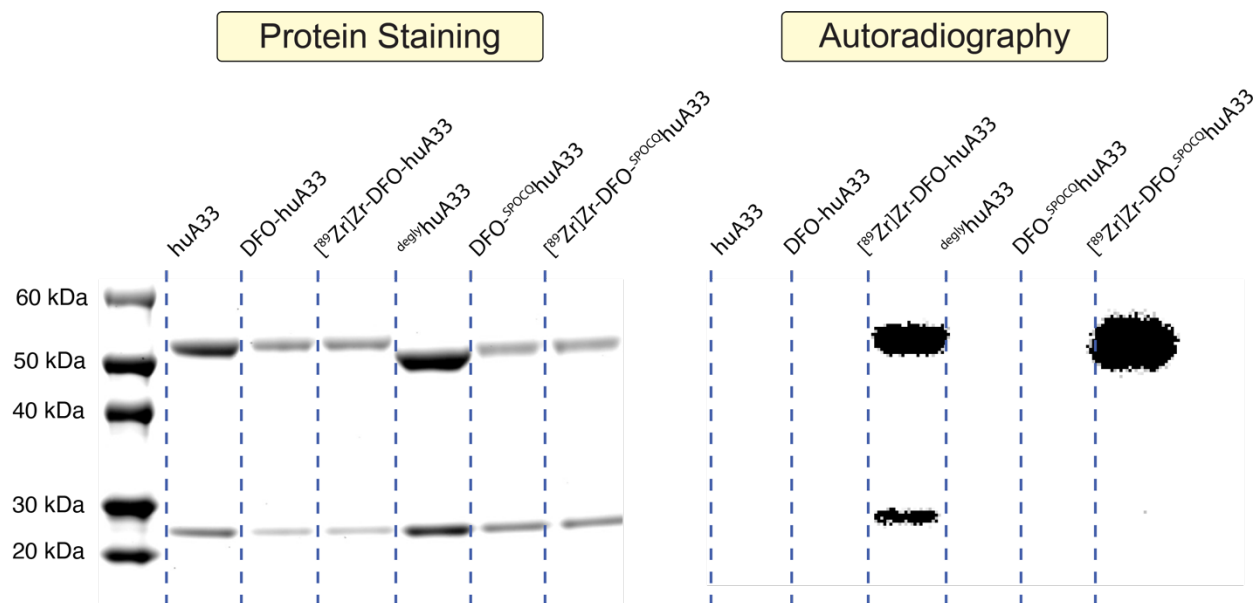

**Figure S6. SDS-PAGE analysis of  $[^{89}\text{Zr}]\text{Zr-DFO-huA33}$  and  $[^{89}\text{Zr}]\text{Zr-DFO-SPOCQhuA33}$ .** Protein-stained reducing SDS-PAGE of the radioimmunoconjugates as well as autoradiography of the stained gel.

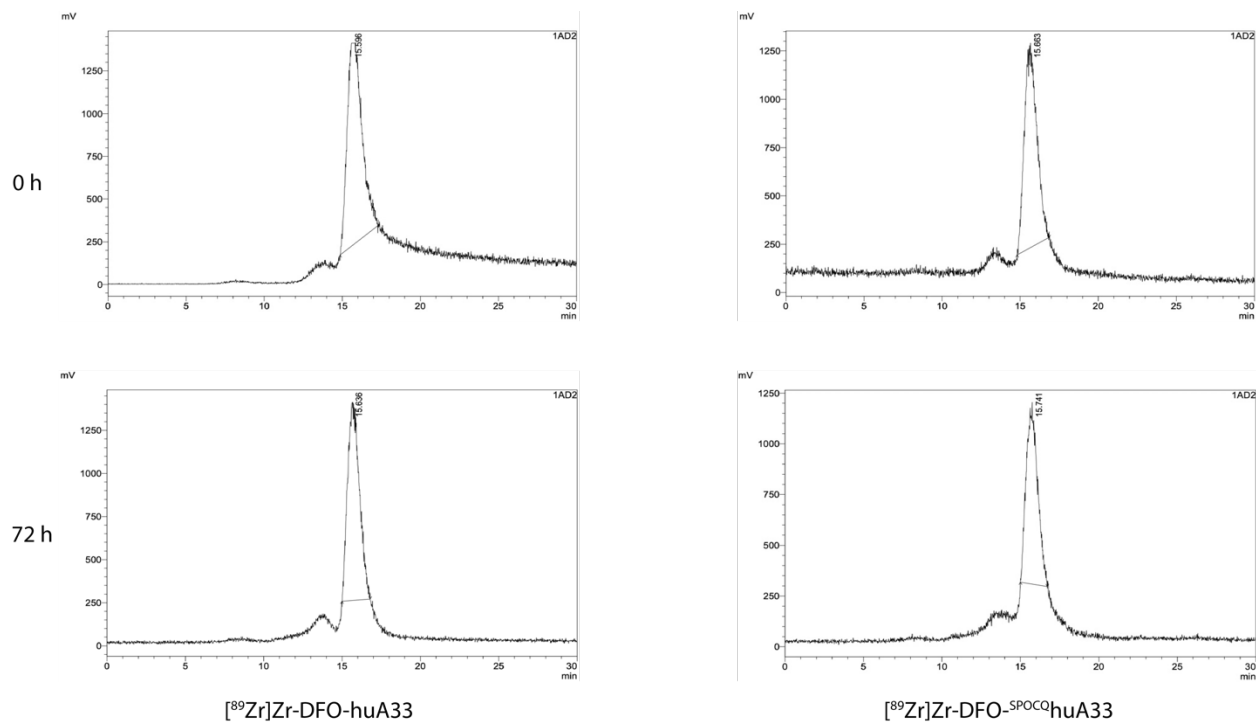

**Figure S7. Radio-size-exclusion HPLC for human serum stability study.** Following the radiosynthesis of  $[^{89}\text{Zr}]\text{Zr-DFO-huA33}$  and  $[^{89}\text{Zr}]\text{Zr-DFO-SPOCQhuA33}$ , the radioimmunoconjugates were incubated in 0.5 mL human serum and placed on a thermomixer at 37 °C, 400 rpm (n = 3). At 0 and 72 h after the start of the study, an aliquot of each radioimmunoconjugate was injected into a size-exclusion HPLC with a radioactivity detector. The peak seen at ~15 minutes is the radiolabeled antibody. Any free  $[^{89}\text{Zr}]\text{Zr}^{4+}$  would be seen as a peak at >20 minutes.



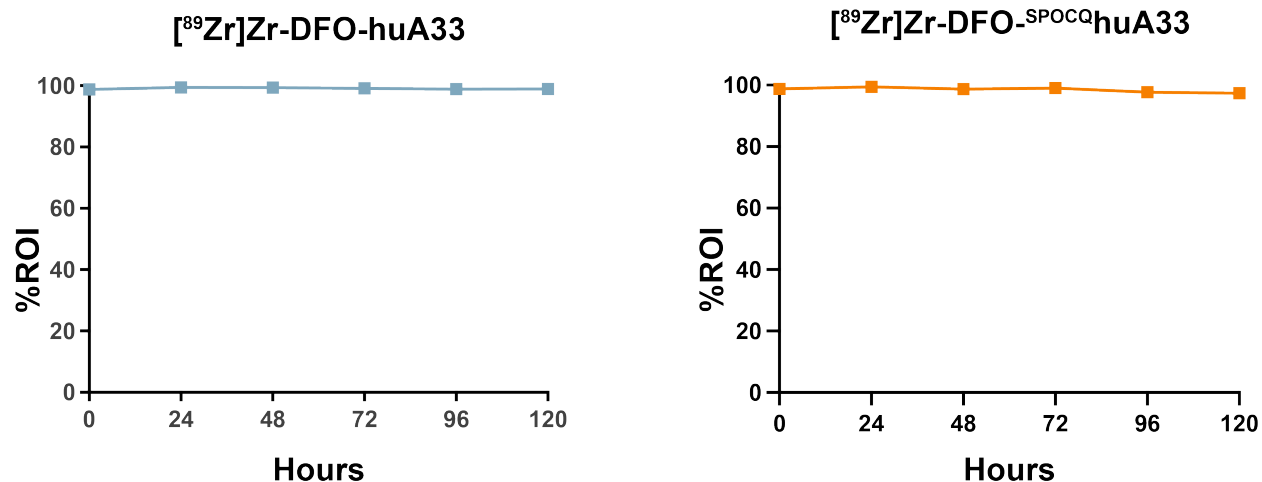

**Figure S8. Human serum stability study.** Following the radiosynthesis of  $[^{89}\text{Zr}]\text{Zr-DFO-huA33}$  and  $[^{89}\text{Zr}]\text{Zr-DFO-SPOCQ-huA33}$ , the radioimmunoconjugates were incubated in 0.5 mL human serum and placed on a thermomixer at 37 °C, 400 rpm. At 0, 24, 48, 72, 96, and 120 h after the start of the study, each radioimmunoconjugate was assayed via radio-iTLC with EDTA (50 mM, pH 5.0) as an eluent. The % radioactivity associated with the antibody at each timepoint was plotted using GraphPad Prism 8.0 (n = 3). This data corresponds with the data shown in Table S8.

## SUPPLEMENTAL TABLES

|                      | <b>Cy5-<sup>SPOCQ</sup>huA33<br/>(One-Pot Trial)</b> | <b>Cy5-<sup>SPOCQ</sup>huA33<br/>(High Equivalents)</b> |
|----------------------|------------------------------------------------------|---------------------------------------------------------|
| <b>DOL (Cy5/mAb)</b> | 0.2 ± 0.02                                           | 1.1 ± 0.1                                               |

**Table S1.** Degree of labeling results of the three-reagent-one-pot approach and the stepwise strategy using a 4 h incubation and quadruple the normal number of equivalents of mTyr and Cy5-TCO.

|               | Cy5-SPOCQ trastuzumab | Cy5-SPOCQ pertuzumab |
|---------------|-----------------------|----------------------|
| DOL (Cy5/mAb) | 1.6 ± 0.2             | 1.7 ± 0.2            |

**Table S2.** Degree of labeling results for trastuzumab and pertuzumab site-specifically modified with Cy5 using the mTyr- and the SPOCQ cycloaddition-based strategy.

|                      | <b>DFO-huA33</b> | <b>DFO-<sup>SPOCQ</sup>huA33</b> |
|----------------------|------------------|----------------------------------|
| <b>DOL (DFO/mAb)</b> | 1.7 ± 0.1        | 1.6 ± 0.1                        |

**Table S3.** Degree of labeling results for huA33 (a) randomly modified with DFO via the stochastic modification of lysines and (b) site-specifically modified with DFO using our approach based on mTyr and the SPOCQ cycloaddition.

| <b>Organs</b>       | <b>[<sup>89</sup>Zr]Zr-DFO-huA33</b> | <b>[<sup>89</sup>Zr]Zr-DFO-<sup>SPOCQ</sup>huA33</b> |
|---------------------|--------------------------------------|------------------------------------------------------|
| <b>Blood</b>        | 2.1 ± 1.6                            | 3.0 ± 0.8                                            |
| <b>Tumor</b>        | 70.0 ± 33.8                          | 109.8 ± 17.6                                         |
| <b>Heart</b>        | 2.0 ± 0.5                            | 1.5 ± 0.2                                            |
| <b>Lungs</b>        | 1.4 ± 0.8                            | 1.7 ± 0.2                                            |
| <b>Liver</b>        | 4.0 ± 1.4                            | 2.7 ± 0.8                                            |
| <b>Spleen</b>       | 2.0 ± 0.8                            | 2.5 ± 1.1                                            |
| <b>Pancreas</b>     | 0.7 ± 0.3                            | 0.6 ± 0.2                                            |
| <b>Stomach</b>      | 0.6 ± 0.2                            | 0.5 ± 0.2                                            |
| <b>S. Intestine</b> | 1.2 ± 0.4                            | 0.6 ± 0.1                                            |
| <b>L. Intestine</b> | 0.9 ± 0.0                            | 0.5 ± 0.1                                            |
| <b>Kidneys</b>      | 1.7 ± 0.8                            | 4.9 ± 0.5                                            |
| <b>Ovaries</b>      | 1.4 ± 0.6                            | 1.2 ± 1.1                                            |
| <b>Muscle</b>       | 0.4 ± 0.3                            | 0.5 ± 0.2                                            |
| <b>Bone</b>         | 4.6 ± 0.5                            | 7.0 ± 5.3                                            |
| <b>Skin</b>         | 2.1 ± 0.9                            | 1.8 ± 1.2                                            |
| <b>Tail</b>         | 3.1 ± 2.3                            | 1.5 ± 0.1                                            |

**Table S4. Biodistribution data from mice bearing SW1222 xenografts.** Biodistribution data collected 120 h after the intravenous administration of [<sup>89</sup>Zr]Zr-DFO-huA33 or [<sup>89</sup>Zr]Zr-DFO-<sup>SPOCQ</sup>huA33 [3.7 -4.0 MBq (100-110 µCi), 20-22 µg, in 100 µL of PBS] to athymic nude mice bearing A33-expressing SW1222 colorectal carcinoma xenografts (n = 4). Values are in units of %ID/g and are expressed as mean ± standard deviation.

| Organs       | [ <sup>89</sup> Zr]Zr-DFO-huA33 | [ <sup>89</sup> Zr]Zr-DFO- <sup>SPOCQ</sup> huA33 |
|--------------|---------------------------------|---------------------------------------------------|
| Blood        | 0.3 ± 0.1                       | 5.7 ± 0.4                                         |
| Tumor        | 33.1 ± 10.6                     | 76.2 ± 13.0                                       |
| Heart        | 1.8 ± 0.6                       | 1.1 ± 0.6                                         |
| Lungs        | 1.6 ± 0.2                       | 3.3 ± 1.8                                         |
| Liver        | 16.2 ± 0.6                      | 5.9 ± 2.1                                         |
| Spleen       | 42.1 ± 8.6                      | 9.7 ± 4.0                                         |
| Pancreas     | 1.1 ± 0.8                       | 0.9 ± 0.6                                         |
| Stomach      | 1.1 ± 0.4                       | 1.2 ± 0.1                                         |
| S. Intestine | 5.1 ± 0.4                       | 1.7 ± 0.2                                         |
| L. Intestine | 1.2 ± 0.6                       | 2.9 ± 3.7                                         |
| Kidneys      | 1.4 ± 0.3                       | 6.2 ± 5.7                                         |
| Ovaries      | 3.1 ± 1.4                       | 1.0 ± 0.2                                         |
| Muscle       | 0.3 ± 0.1                       | 0.3 ± 0.1                                         |
| Bone         | 8.2 ± 5.1                       | 6.6 ± 0.5                                         |
| Skin         | 2.2 ± 0.2                       | 3.8 ± 0.4                                         |
| Tail         | 2.7 ± 1.3                       | 2.0 ± 0.2                                         |

**Table S5. Biodistribution data from mice bearing SW1222 xenografts.** Biodistribution data collected 120 h after the intravenous administration of [<sup>89</sup>Zr]Zr-DFO-huA33 or [<sup>89</sup>Zr]Zr-DFO-<sup>SPOCQ</sup>huA33 [3.7 -4.0 MBq (100-110 μCi), 20-22 μg, in 100 μL of PBS] to NSG mice bearing A33-expressing SW1222 colorectal carcinoma xenografts (n = 4). Values are in units of %ID/g and are expressed as mean ± standard deviation.

| Immunoconjugate<br>Concentration<br>( $\mu\text{g/ml}$ ) | Absorbance @ 450 nm |                        |                  |                             |
|----------------------------------------------------------|---------------------|------------------------|------------------|-----------------------------|
|                                                          | huA33               | <sup>degly</sup> huA33 | DFO-huA33        | DFO- <sup>SPOCQ</sup> huA33 |
| <b>1000</b>                                              | 0.44 $\pm$ 0.03     | 0.45 $\pm$ 0.01        | 0.41 $\pm$ 0.02  | 0.43 $\pm$ 0.004            |
| <b>333.3</b>                                             | 0.41 $\pm$ 0.02     | 0.44 $\pm$ 0.01        | 0.38 $\pm$ 0.02  | 0.41 $\pm$ 0.01             |
| <b>111.1</b>                                             | 0.38 $\pm$ 0.31     | 0.41 $\pm$ 0.002       | 0.34 $\pm$ 0.02  | 0.38 $\pm$ 0.01             |
| <b>37.03</b>                                             | 0.31 $\pm$ 0.01     | 0.35 $\pm$ 0.01        | 0.26 $\pm$ 0.02  | 0.33 $\pm$ 0.003            |
| <b>12.34</b>                                             | 0.2 $\pm$ 0.01      | 0.25 $\pm$ 0.01        | 0.17 $\pm$ 0.002 | 0.25 $\pm$ 0.004            |
| <b>4.115</b>                                             | 0.12 $\pm$ 0.01     | 0.16 $\pm$ 0.02        | 0.10 $\pm$ 0.001 | 0.18 $\pm$ 0.01             |
| <b>1.371</b>                                             | 0.07 $\pm$ 0.002    | 0.11 $\pm$ 0.01        | 0.07 $\pm$ 0.003 | 0.15 $\pm$ 0.03             |
| <b>0.475</b>                                             | 0.06 $\pm$ 0.002    | 0.10 $\pm$ 0.02        | 0.06 $\pm$ 0.01  | 0.14 $\pm$ 0.01             |

**Table S6. ELISA results for A33 binding.** A33-coated plates were incubated with varying concentrations of huA33, <sup>degly</sup>huA33, DFO-huA33, or DFO-<sup>SPOCQ</sup>huA33 (n = 3). After a 2 h incubation, HRP-labeled goat anti-human secondary antibody was incubated in each well for 1 h followed by TMB for 10 minutes. The absorbance of each well was detected on a microplate reader, and the results were analyzed using GraphPad Prism 8.0 software. This data corresponds with the data shown in Figure 2.

| Immunoconjugate<br>Concentration<br>( $\mu\text{g/ml}$ ) | Absorbance @ 450 nm |                        |                  |                             |
|----------------------------------------------------------|---------------------|------------------------|------------------|-----------------------------|
|                                                          | huA33               | <sup>degly</sup> huA33 | DFO-huA33        | DFO- <sup>SPOCQ</sup> huA33 |
| <b>1000</b>                                              | 0.49 $\pm$ 0.01     | 0.14 $\pm$ 0.01        | 0.46 $\pm$ 0.01  | 0.18 $\pm$ 0.01             |
| <b>333.3</b>                                             | 0.44 $\pm$ 0.01     | 0.10 $\pm$ 0.002       | 0.41 $\pm$ 0.01  | 0.11 $\pm$ 0.002            |
| <b>111.1</b>                                             | 0.38 $\pm$ 0.01     | 0.07 $\pm$ 0.00        | 0.35 $\pm$ 0.01  | 0.07 $\pm$ 0.001            |
| <b>37.03</b>                                             | 0.28 $\pm$ 0.01     | 0.05 $\pm$ 0.003       | 0.24 $\pm$ 0.01  | 0.06 $\pm$ 0.002            |
| <b>12.34</b>                                             | 0.16 $\pm$ 0.002    | 0.04 $\pm$ 0.001       | 0.13 $\pm$ 0.004 | 0.05 $\pm$ 0.001            |
| <b>4.115</b>                                             | 0.09 $\pm$ 0.002    | 0.04 $\pm$ 0.00        | 0.08 $\pm$ 0.003 | 0.05 $\pm$ 0.003            |
| <b>1.371</b>                                             | 0.06 $\pm$ 0.001    | 0.04 $\pm$ 0.001       | 0.06 $\pm$ 0.004 | 0.05 $\pm$ 0.01             |
| <b>0.475</b>                                             | 0.07 $\pm$ 0.003    | 0.04 $\pm$ 0.001       | 0.05 $\pm$ 0.001 | 0.04 $\pm$ 0.001            |

**Table S7. ELISA results for hFc $\gamma$ RI binding.** hFc $\gamma$ RI- coated plates were incubated with varying concentrations of huA33, <sup>degly</sup>huA33, DFO-huA33, or DFO-<sup>SPOCQ</sup>huA33 (n = 3). After a 2 h incubation, HRP-labeled goat anti-human secondary antibody was incubated in each well for 1 h followed by TMB for 10 minutes. The absorbance of each well was detected on a microplate reader, and the results were analyzed using GraphPad Prism 8.0 software. This data corresponds with the data shown in Figure 2.



| Constructs                                                  | %ROI of radio-iTLC |            |            |            |            |            |
|-------------------------------------------------------------|--------------------|------------|------------|------------|------------|------------|
|                                                             | 0 h                | 24 h       | 48 h       | 72 h       | 96 h       | 120 h      |
| $[^{89}\text{Zr}]\text{Zr-DFO-huA33}$                       | 98.8 ± 0.3         | 99.4 ± 0.2 | 99.4 ± 0.2 | 99.1 ± 0.2 | 98.9 ± 0.1 | 99.0 ± 0.2 |
| $[^{89}\text{Zr}]\text{Zr-DFO-}^{\text{SPOCQ}}\text{huA33}$ | 98.8 ± 0.2         | 99.4 ± 0.1 | 98.7 ± 0.3 | 99.0 ± 0.0 | 97.7 ± 0.3 | 97.4 ± 0.6 |

**Table S8. Human serum stability study results.** Following the radiosynthesis of  $[^{89}\text{Zr}]\text{Zr-DFO-huA33}$  and  $[^{89}\text{Zr}]\text{Zr-DFO-}^{\text{SPOCQ}}\text{huA33}$ , the radioimmunoconjugates were incubated in 0.5 mL human serum and placed on a thermomixer at 37 °C, 400 rpm. At 0, 24, 48, 72, 96, and 120 h after the start of the study, each radioimmunoconjugate was assayed via radio-iTLC using EDTA (50 mM, pH 5.0) as the eluent (n = 3). This data corresponds with the data shown in Figure S8.
